# Supplementary material for: Counting bubbles: precision process control of gas–liquid reactions in flow with an optical inline sensor
Source: Royal Society of Chemistry journal article supplement (doi:10.1039/c8re00186c), 2018-10-23
Supplement: c8re00186c1.pdf [file c8re00186c1.pdf]

## Electronic Supplementary Information

### Counting bubbles: precision process control of gas-liquid reactions in flow with an optical inline sensor

Nikolay Cherkasov<sup>a,b,\*</sup>, Antonio José Expósito<sup>a,b</sup>, Yang Bai<sup>a</sup>, Evgeny V. Rebrov<sup>a,b,c,\*</sup>

<sup>a</sup> School of Engineering, University of Warwick, Coventry CV4 7AL, UK

<sup>b</sup> Stoli Catalysts Ltd, Coventry, CV3 4DS, UK

<sup>c</sup> Department of Biotechnology and Chemistry, Tver State Technical University, 170026, Nab. A. Nikitina 22, Russia,

Corresponding authors: n. cherkasov@warwick.ac.uk, e.rebrov@warwick.ac.uk

#### S1. Calculation of the product selectivity and conversion

The liquid samples collected during the experiments were analysed with the offline gas chromatograph. The conversion and selectivity to semi-hydrogenated product were calculated using equations 1 and 2

$$X = 1 - \frac{C_{\text{substrate}}}{C_{\text{substrate}}^0}, \quad (1)$$

$$S = \frac{C_{\text{product}}}{C_{\text{substrate}}^0 - C_{\text{substrate}}}, \quad (2)$$

where  $C_{\text{substrate}}$  and  $C_{\text{substrate}}^0$  are the substrate concentrations in the outlet and initial streams;  $C_{\text{product}}$  is the product concentration. The control system used a proportional-integral algorithm to adjust the substrate and proportional H<sub>2</sub> flow rates to maintain the readings of the optical sensor at 95±1%.

#### S2. Experimental details in validation of the liquid sensor

The system used for the optical sensor calibration and validation experiments (Fig. S1) contained an HPLC pump (Knauer P4.1S) for isopropanol and a mass-flow controller Bronkhorst for N<sub>2</sub> (0.03-3.00 mL min<sup>-1</sup>; All gas flow rates in the work are related to normal temperature and pressure). Gas and liquid flows were combined in a standard IDEX T mixer flowing into fluorinated ethylene propylene (FEP) tubing 0.5 mm internal diameter (ID), 0.5 m long. Taylor flow with constant bubble sizes was observed after the T mixer. Gas and liquid flow rate were independently verified with the standard volumetric and gravimetric methods.<sup>1</sup> The optical sensor (Optek OCB350L125Z) was placed 4 cm before the tube exit to ensure that the bubble pressure is close to atmospheric. In a separate set of experiments, a semi-prep inline IDEX A-410 filter was inserted after the T mixer to introduce non-uniformity into the flow.

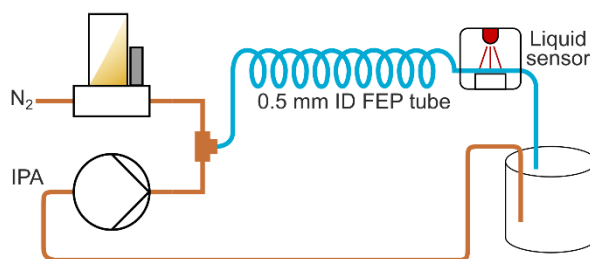

**Fig. S1** Scheme of the system used for validation of the optical sensor readings

The known liquid fraction (LF) was calculated with equation 3, where  $Q_{liq}$  is the liquid flow rate and  $Q_{gas}$  is the gas flow rate at normal temperature and pressure from the mass flow controller.

$$LF = \frac{Q_{liq}}{(Q_{liq} + Q_{gas} \cdot k)} \quad (3)$$

Coefficient  $k$  accounts for solvent evaporation and the difference between the observed and the normal conditions. Equation 4 shows the calculation of  $k$ , where  $T_{NTP}$  and  $P_{NTP}$  are normal temperature and pressure,  $T_m$  and  $P_m$  are temperature and atmospheric pressure during the measurements,  $P_{vap}$  is the saturated vapour pressure of isopropanol at  $T_m$ .<sup>1</sup>

$$k = \frac{P_{NTP}}{P_m - P_{vap}} \frac{T_m}{T_{NTP}} \quad (4)$$

### S3. Long-term stability of the Pd/ZnO catalyst at constant flow rates

Fig S2 shows deactivation of the 5 wt% Pd/ZnO tube in solvent-free hydrogenation of 2-methyl-3-butyn-2-ol under constant flow rates described in detail in reference.<sup>2</sup>

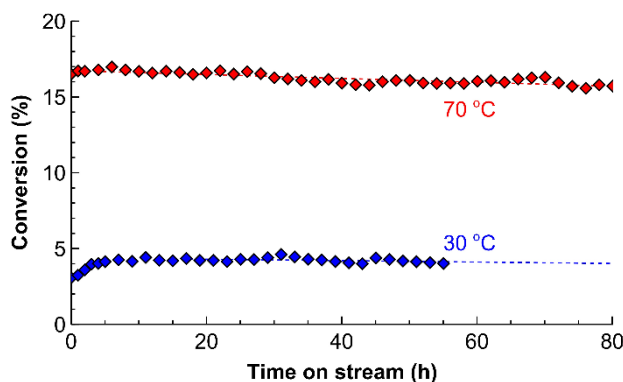

**Fig. S2** Deactivation of the Pd/ZnO catalyst coated inside a 0.86 m tube reactor at 30 °C and 70 °C at constant flow rates of 100  $\mu\text{L min}^{-1}$  solvent-free MBY and 10  $\text{mL min}^{-1}$  (STP)  $\text{H}_2$  at 1 bar. The figure is taken from ref.<sup>2</sup>

#### References:

- 1 W. C. Baker and J. F. Pouchot, *J. Air Pollut. Control Assoc.*, 1983, **33**, 156–162.
- 2 N. Cherkasov, Y. Bai and E. Rebrov, *Catalysts*, 2017, **7**, 1–16.
